# Supplementary material
Source: Springer Nature journal article supplement (https://www.springermedizin.de/resource/supplementary/13223_2013_404_MOESM3_ESM.pdf/9597840)

## Any discharge

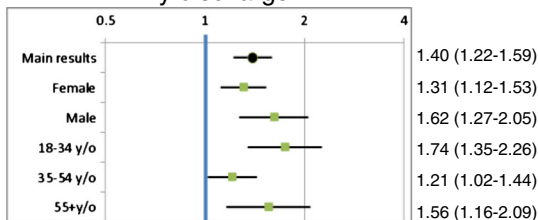

## Asthma-related discharge

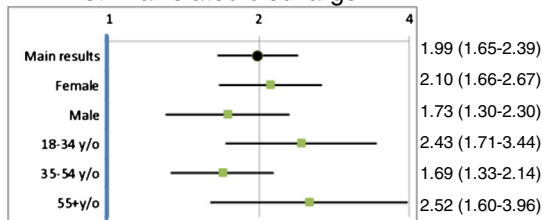

## Non-asthma-related discharge

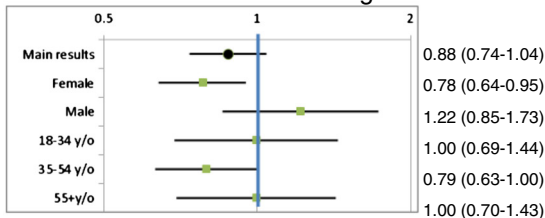

## Respiratory-related discharge

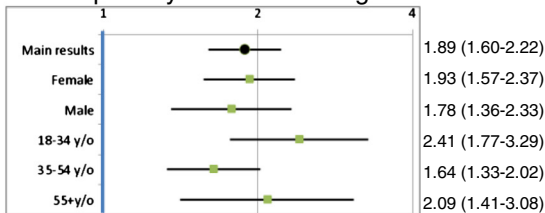

## Respiratory-related, non-asthma discharge

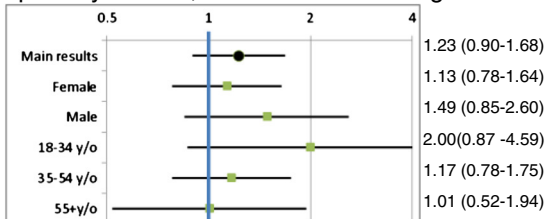

## None-respiratory-related discharge

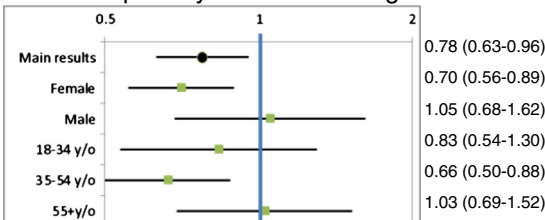

Supplement: MOESM3 [file 9597840]
